# Supplementary material for: Low below-ground organic carbon storage in a subarctic Alpine permafrost environment
Source: Copernicus journal article supplement (doi:10.5194/tc-9-427-2015), 2015-03-02
Supplement: Supplementary file 1 [file tc-9-427-2015-supplement.zip]

Archive with 5 entries (5 files):
- FS02.pdf
- TS02.pdf
- tc-9-427-2015-supplement-cover-letter.pdf
- TS01.pdf
- FS01.pdf
