# Supplementary material for: Low below-ground organic carbon storage in a subarctic Alpine permafrost environment
Source: Copernicus journal article supplement (doi:10.5194/tc-9-427-2015), 2015-03-02
Supplement: Supplementary file 1 [file tc-9-427-2015-supplement.zip › FS01.pdf]

**Legend**

- Permafrost Probability Isolines
- Permafrost Probability Isolines (0.5 and 0.9)

**SOC [kg C m-2]**

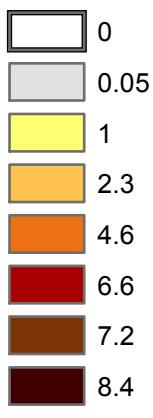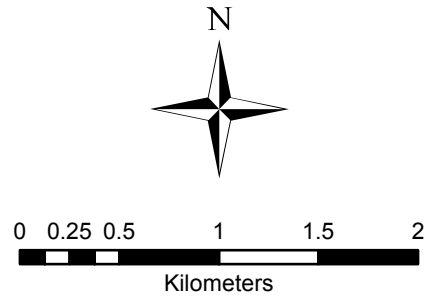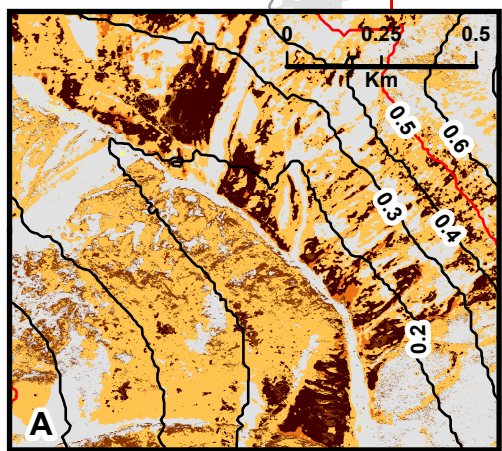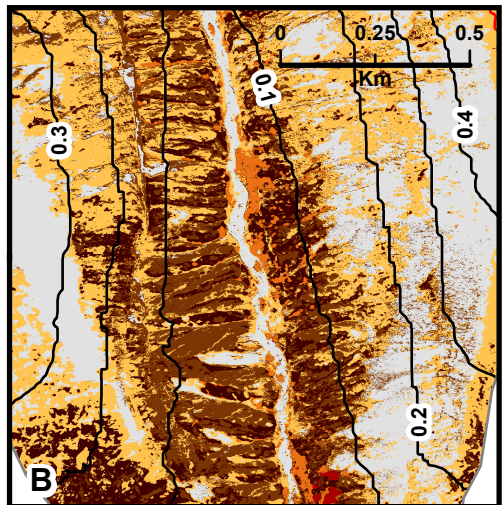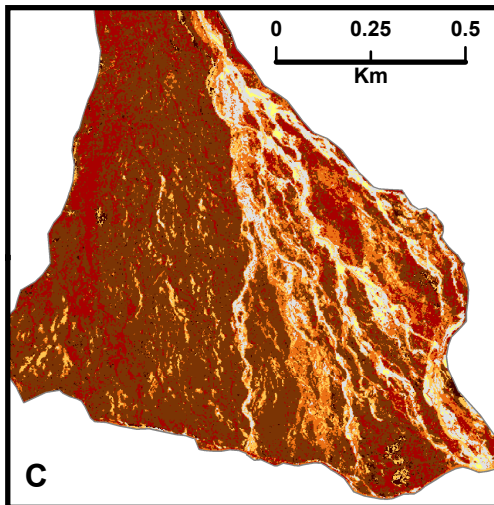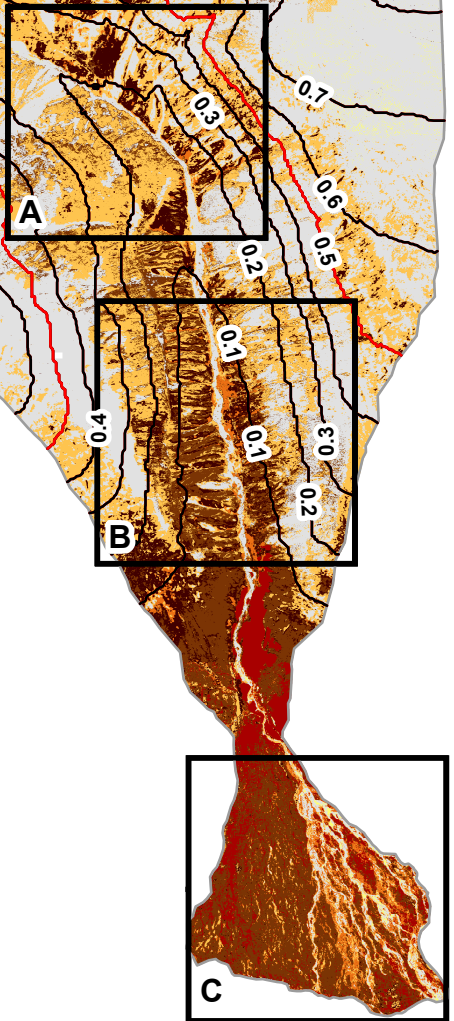

**Figure S1.** SOC distribution in Tarfala Valley including permafrost probability isolines. (A), (B) and (C) show relative C-rich sectors of the study area.
