# Supplementary material for: Low below-ground organic carbon storage in a subarctic Alpine permafrost environment
Source: Copernicus journal article supplement (doi:10.5194/tc-9-427-2015), 2015-03-02
Supplement: Supplementary file 1 [file tc-9-427-2015-supplement.zip › FS02.pdf]

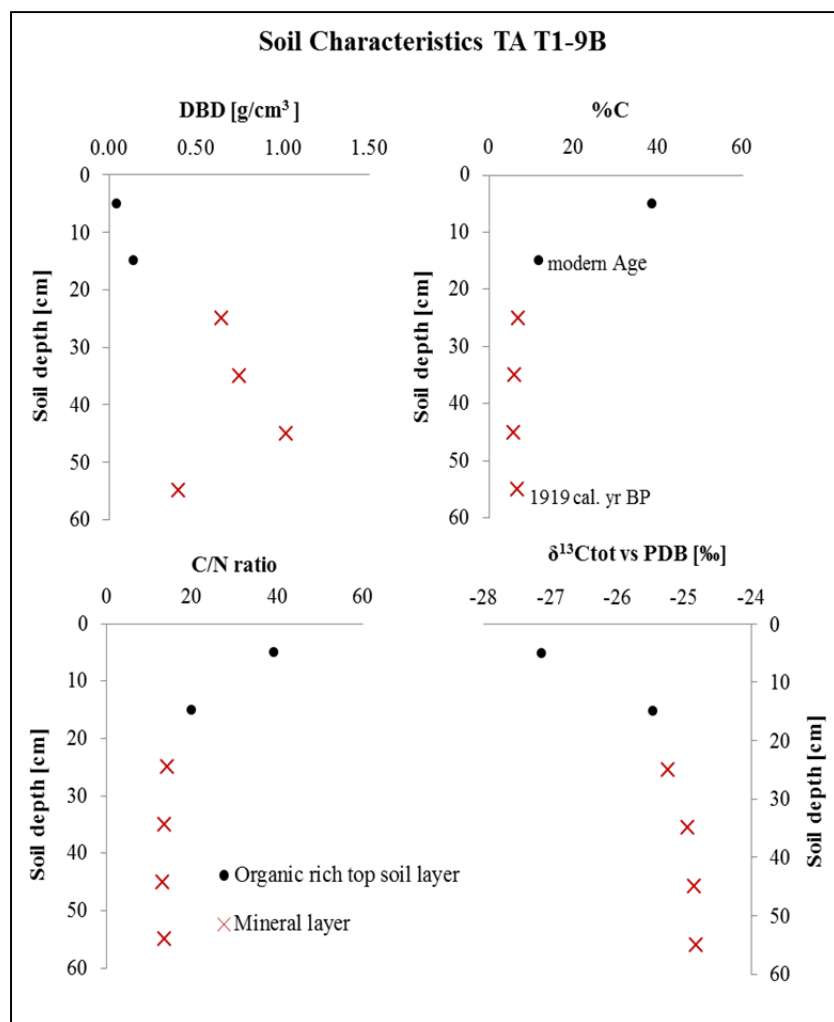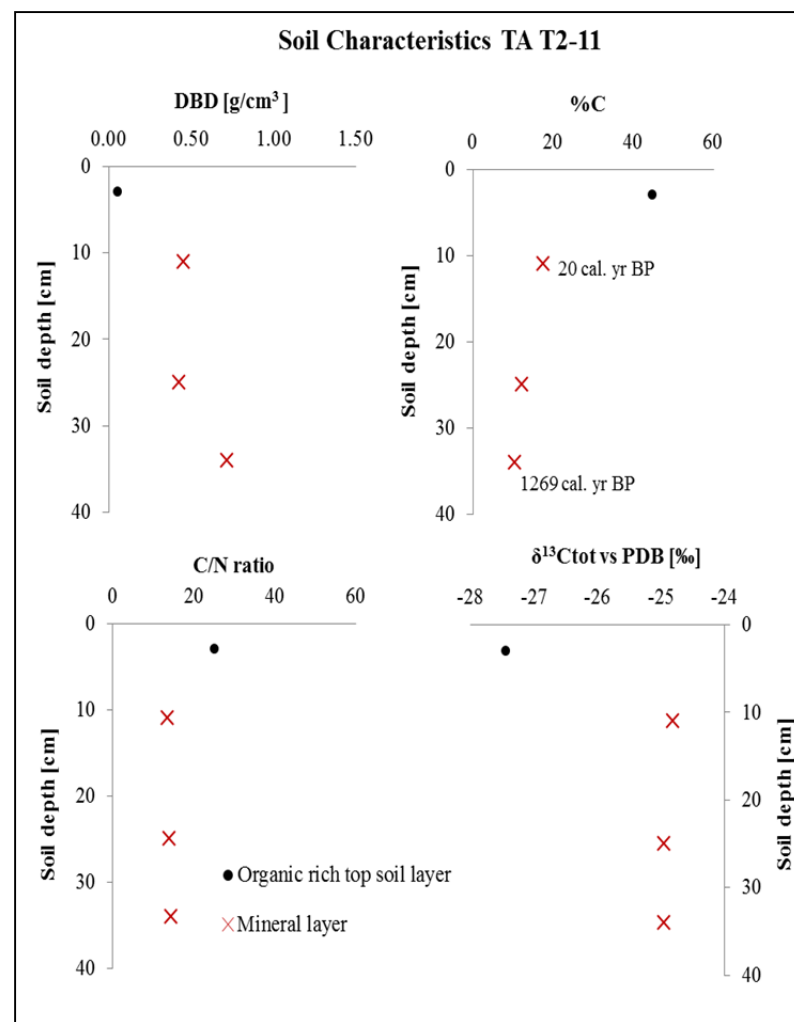

**Figure S2.** Characteristics of the two radiocarbon dated soil profiles. DBD: Dry bulk density (g/cm<sup>3</sup>); %C: Percentage organic C in the soil; C/N (weight) ratio; δ<sup>13</sup>C<sub>tot</sub> vs PDB (‰): stable isotope δ<sup>13</sup>C analyzed to the international standard PeeDeeBelemnite
