# Supplementary material for: Low below-ground organic carbon storage in a subarctic Alpine permafrost environment
Source: Copernicus journal article supplement (doi:10.5194/tc-9-427-2015), 2015-03-02
Supplement: Supplementary file 1 [file tc-9-427-2015-supplement.zip › tc-9-427-2015-supplement-cover-letter.pdf]

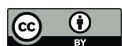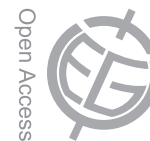

## *Supplement of*

# **Low below-ground organic carbon storage in a subarctic Alpine permafrost environment**

**M. Fuchs et al.**

*Correspondence to:* M. Fuchs ([matthias.fuchs@awi.de](mailto:matthias.fuchs@awi.de))

- [tc-9-427-2015-supplement-cover-letter.pdf](#)
- [FS01.pdf](#)
- [FS02.pdf](#)
- [TS01.pdf](#)
- [TS02.pdf](#)
