# Supplementary material for: Low below-ground organic carbon storage in a subarctic Alpine permafrost environment
Source: Copernicus journal article supplement (doi:10.5194/tc-9-427-2015), 2015-03-02
Supplement: Supplementary file 1 [file tc-9-427-2015-supplement.zip › TS01.pdf]

**Table S1:** Land cover classes and their distribution in the study area (Photos: M. Fuchs).

| Land Cover<br>(mean altitude)                     | Criteria and % stones<br>within the class                                                                                                      | Picture                                                                              |
|---------------------------------------------------|------------------------------------------------------------------------------------------------------------------------------------------------|--------------------------------------------------------------------------------------|
| Birch Forest<br>(656 m a.p.s.l.)                  | Mountain birch<br>( $\geq 10\%$ )<br><br>on average 4% stones                                                                                  | 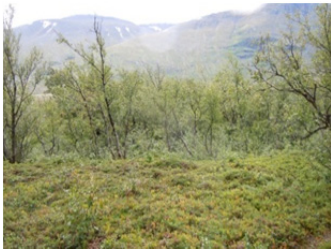   |
| Tundra<br>Meadow<br>(652 m a.p.s.l.)              | relatively flat and treeless<br>area with dwarf shrubs<br>herbs, graminoids,<br>mosses, lichen and<br>undergrowth<br><br>on average 14% stones | 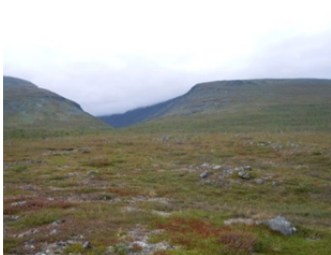   |
| Shrub<br>(688 m a.p.s.l.)                         | $\geq 30\%$ shrub (mainly<br>dwarf shrub) (woody<br>deciduous species as well<br>as evergreen shrubs)<br><br>on average 17% stones             | 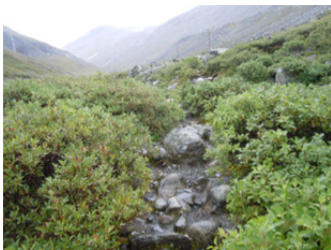  |
| Patchy Boulder<br>Grass/Moss<br>(1129 m a.p.s.l.) | Grass dominated with<br>minor fractions of moss<br>and lichen<br><br>on average 35% stones                                                     | 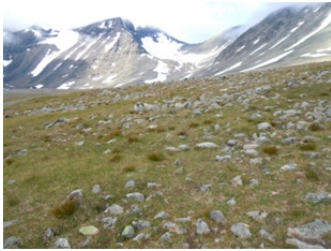 |

| Land Cover<br>(mean altitude)                | Criteria and % stones<br>within the class                                                                                        | Picture                                                                               |
|----------------------------------------------|----------------------------------------------------------------------------------------------------------------------------------|---------------------------------------------------------------------------------------|
| Patchy Boulder<br>Moss<br>(1181 m a.p.s.l.)  | moss or lichen<br>predominant with less<br>than 20% grass<br><br>on average 42% stones                                           | 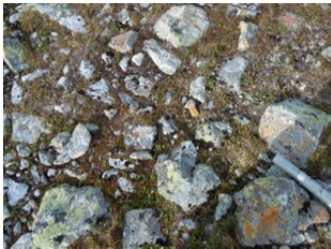   |
| Sand / Gravel<br>(1293 m a.p.s.l.)           | $\geq 50\%$ sand or gravel,<br>organic layer only<br>sparsely present, sampling<br>by pipe possible<br><br>on average 47% stones | 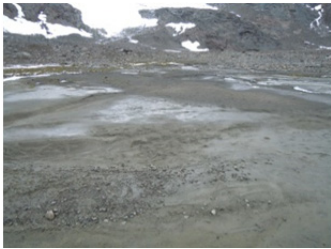   |
| Stones<br>(1304 m a.p.s.l.)                  | $\geq 80\%$ stones and no<br>sampling by pipe possible                                                                           | 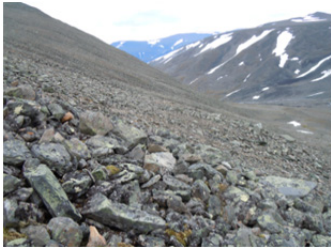  |
| Permanent<br>Snow / Ice<br>(1530 m a.p.s.l.) | No sampling                                                                                                                      | 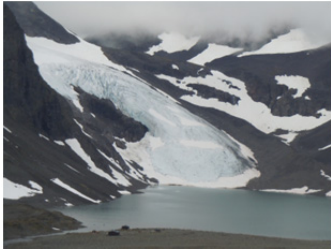 |
| Water<br>(1194 m a.p.s.l.)                   |                                                                                                                                  |                                                                                       |
