# Supplementary material for: Low below-ground organic carbon storage in a subarctic Alpine permafrost environment
Source: Copernicus journal article supplement (doi:10.5194/tc-9-427-2015), 2015-03-02
Supplement: Supplementary file 1 [file tc-9-427-2015-supplement.zip › TS02.pdf]

**Table S2.** Summary of the main characteristics of sites along the five transects. Table contains altitude depth of the surface organic layer, depth of loose mineral deposits, the fraction coarse fragments, the land cover class and generalized reference soil groups according to the FAO World Reference Base for soils (IUSS Working Group WRB, 2007). A generalized description of the main soil classification criterion is included.

| Sample site       | Altitude (m.a.s.l.) | Organic layer depth | Mineral layer depth | Coarse fragments (> 2mm) [weight %] | Land cover class         | WRB Reference Soil Groups | Generalized classification criterion                                       |
|-------------------|---------------------|---------------------|---------------------|-------------------------------------|--------------------------|---------------------------|----------------------------------------------------------------------------|
| <b>Transect 1</b> |                     |                     |                     |                                     |                          |                           |                                                                            |
| TA T1-1           | 1559 m              | 0 cm                | > 70 cm             | 25.5                                | Sand/Gravel              | (Turbic) Cryosols         | Signs of cryoturbation (patterned ground) with permafrost in the upper 2 m |
| TA T1-2           | 1542 m              | 0 cm                | 30 cm               | 45.8                                | Sand/Gravel              | (Turbic) Cryosols         | Signs of cryoturbation (patterned ground) with permafrost in the upper 2 m |
| TA T1-3           | 1518 m              | 1.5 cm              | 70 cm               | 37.5                                | Stones                   | (Turbic) Cryosols         | Signs of cryoturbation (patterned ground) with permafrost in the upper 2 m |
| TA T1-4           | 1485 m              | 4 cm                | 17 cm               | 0.1                                 | Patchy boulder Moss      | (Turbic) Cryosols         | Signs of cryoturbation (patterned ground) with permafrost in the upper 2 m |
| TA T1-5           | 1437 m              | 0 cm                | no sampling         | 1.2                                 | Stones                   | Leptosol                  | Shallow, stony soil with little or no development of soil genetic horizons |
| TA T1-6           | 1372 m              | 0 cm                | no sampling         | 0.0                                 | Stones                   | Leptosol                  | Shallow, stony soil with little or no development of soil genetic horizons |
| TA T1-7           | 1299 m              | 0 cm                | no sampling         | 15.5                                | Stones                   | Leptosol                  | Shallow, stony soil with little or no development of soil genetic horizons |
| TA T1-8           | 1247 m              | 0 cm                | no sampling         | 0.0                                 | Stones                   | Leptosol                  | Shallow, stony soil with little or no development of soil genetic horizons |
| TA T1-9           | 1204 m              | 0 cm                | no sampling         | 0.0                                 | Stones                   | Leptosol                  | Shallow, stony soil with little or no development of soil genetic horizons |
| TA T1-9B          | 1202 m              | 20 cm               | 70 cm               | 0.8                                 | Patchy boulder Gras/Moss | Regosol                   | Soil with limited/insignificant soil genetic horizon development           |
| TA T1-10          | 1179 m              | 2 cm                | no sampling         | 7.8                                 | Stones                   | Leptosol                  | Shallow, stony soil with little or no development of soil genetic horizons |
| TA T1-11          | 1162 m              | 4 cm                | 37 cm               | 38.4                                | Patchy boulder Moss      | Leptosol                  | Shallow, stony soil with little or no development of soil genetic horizons |
| TA T1-12          | 1141 m              | 3.5 cm              | 38 cm               | 43.9                                | Patchy boulder Moss      | Leptosol                  | Shallow, stony soil with little or no development of soil genetic horizons |
| TA T1-13          | 1119 m              | 3 cm                | 75 cm               | 0.5                                 | Patchy boulder Moss      | Regosol                   | Soil with limited/insignificant soil genetic horizon development           |
| TA T1-14          | 1122 m              | 0 cm                | 80 cm               | 18.2                                | Sand/Gravel              | Leptosol                  | Shallow, stony soil with little or no development of soil genetic horizons |
| TA T1-15          | 1154 m              | 0 cm                | no sampling         | 25.3                                | Stones                   | Leptosol                  | Shallow, stony soil with little or no development of soil genetic horizons |

**Transect 2**

|          |        |        |         |      |                          |          |                                                                            |
|----------|--------|--------|---------|------|--------------------------|----------|----------------------------------------------------------------------------|
| TA T2-1  | 1174 m | 2 cm   | 70 cm   | 35.4 | Patchy boulder Moss      | Leptosol | Shallow, stony soil with little or no development of soil genetic horizons |
| TA T2-2  | 1175 m | 4 cm   | 48 cm   | 42.4 | Patchy boulder Moss      | Regosol  | Soil with limited/insignificant soil genetic horizon development           |
| TA T2-3  | 1175 m | 0 cm   | 40 cm   | 62.9 | Sand/Gravel              | Leptosol | Shallow, stony soil with little or no development of soil genetic horizons |
| TA T2-4  | 1171 m | 2 cm   | 12 cm   | 44.8 | Patchy boulder Gras/Moss | Leptosol | Shallow, stony soil with little or no development of soil genetic horizons |
| TA T2-5  | 1174 m | 4 cm   | 36 cm   | 24.4 | Patchy boulder Moss      | Leptosol | Shallow, stony soil with little or no development of soil genetic horizons |
| TA T2-6  | 1166 m | 3.5 cm | 30cm    | 1.5  | Patchy boulder Gras/Moss | Leptosol | Shallow, stony soil with little or no development of soil genetic horizons |
| TA T2-7  | 1161 m | 5 cm   | 15 cm   | 2.1  | Patchy boulder Gras/Moss | Leptosol | Shallow, stony soil with little or no development of soil genetic horizons |
| TA T2-8  | 1159 m | 4 cm   | > 70 cm | 34.4 | Patchy boulder Gras/Moss | Regosol  | Soil with limited/insignificant soil genetic horizon development           |
| TA T2-9  | 1161 m | 6 cm   | 23 cm   | 13.7 | Patchy boulder Gras/Moss | Leptosol | Shallow, stony soil with little or no development of soil genetic horizons |
| TA T2-10 | 1144 m | 4 cm   | 20 cm   | 41.7 | Patchy boulder Gras/Moss | Leptosol | Shallow, stony soil with little or no development of soil genetic horizons |
| TA T2-11 | 1114 m | 6 cm   | 37 cm   | 1.2  | Patchy boulder Gras/Moss | Leptosol | Shallow, stony soil with little or no development of soil genetic horizons |
| TA T2-12 | 1103 m | 5.5 cm | 17 cm   | 44.3 | Patchy boulder Gras/Moss | Leptosol | Shallow, stony soil with little or no development of soil genetic horizons |
| TA T2-13 | 1076 m | 5 cm   | 14 cm   | 22.9 | Patchy boulder Moss      | Leptosol | Shallow, stony soil with little or no development of soil genetic horizons |
| TA T2-14 | 1045 m | 5 cm   | 44 cm   | 34.4 | Patchy boulder Gras/Moss | Leptosol | Shallow, stony soil with little or no development of soil genetic horizons |
| TA T2-15 | 993 m  | 4 cm   | > 85 cm | 35.5 | Patchy boulder Gras/Moss | Regosol  | Soil with limited/insignificant soil genetic horizon development           |

**Transect 3**

|          |        |        |         |      |                     |          |                                                                            |
|----------|--------|--------|---------|------|---------------------|----------|----------------------------------------------------------------------------|
| TA T3-1  | 1177 m | 1.5 cm | 25 cm   | 5.7  | Patchy boulder Moss | Fluvisol | Poorly developed soil in fluvial sediments                                 |
| TA T3-2  | 1186 m | 0 cm   | 85 cm   | 12.6 | Sand/Gravel         | Fluvisol | Poorly developed soil in fluvial sediments                                 |
| TA T3-3  | 1174 m | 0 cm   | 70 cm   | 34.4 | Sand/Gravel         | Fluvisol | Poorly developed soil in fluvial sediments                                 |
| TA T3-4  | 1181 m | 0 cm   | 13 cm   | 19.7 | Sand/Gravel         | Leptosol | Shallow, stony soil with little or no development of soil genetic horizons |
| TA T3-5  | 1161 m | 1.5 cm | 10 cm   | 26.4 | Patchy boulder Moss | Leptosol | Shallow, stony soil with little or no development of soil genetic horizons |
| TA T3-6  | 1180 m | 0 cm   | 30 cm   | 38.7 | Sand/Gravel         | Leptosol | Shallow, stony soil with little or no development of soil genetic horizons |
| TA T3-7  | 1166 m | 0 cm   | 30 cm   | 47.5 | Patchy boulder Moss | Leptosol | Shallow, stony soil with little or no development of soil genetic horizons |
| TA T3-7B | 1161 m | 0 cm   | > 80 cm | 5.2  | Patchy boulder Moss | Regosol  | Soil with limited/insignificant soil genetic horizon development           |

**Transect 4**

|         |       |        |       |     |               |          |                                                                            |
|---------|-------|--------|-------|-----|---------------|----------|----------------------------------------------------------------------------|
| TA T4-1 | 864 m | 2 cm   | 20 cm | 0.2 | Tundra Meadow | Leptosol | Shallow, stony soil with little or no development of soil genetic horizons |
| TA T4-2 | 824 m | 2.5 cm | 10 cm | 4.5 | Shrub         | Leptosol | Shallow, stony soil with little or no development of soil genetic horizons |
| TA T4-3 | 795 m | 6 cm   | 27 cm | 4.7 | Shrub         | Leptosol | Shallow, stony soil with little or no development of soil genetic horizons |

**Transect 5**

|          |       |        |             |      |               |          |                                                                            |
|----------|-------|--------|-------------|------|---------------|----------|----------------------------------------------------------------------------|
| TA T5-1  | 744 m | 10 cm  | 25 cm       | 13.1 | Tundra Meadow | Leptosol | Shallow, stony soil with little or no development of soil genetic horizons |
| TA T5-2  | 713 m | 1 cm   | 10 cm       | 6.7  | Tundra Meadow | Leptosol | Shallow, stony soil with little or no development of soil genetic horizons |
| TA T5-3  | 675 m | 4 cm   | no sampling | 0.0  | Birch Forest  | Leptosol | Shallow, stony soil with little or no development of soil genetic horizons |
| TA T5-4  | 658 m | 6 cm   | 48 cm       | 22.1 | Birch Forest  | Cambisol | Moderately developed soil, with some development of soil horizons          |
| TA T5-5  | 636 m | 2 cm   | 24 cm       | 0.6  | Birch Forest  | Leptosol | Shallow, stony soil with little or no development of soil genetic horizons |
| TA T5-6  | 625 m | 0 cm   | no sampling | 0.0  | Shrub         | Leptosol | Shallow, stony soil with little or no development of soil genetic horizons |
| TA T5-7  | 615 m | 4.5 cm | 14 cm       | 2.9  | Shrub         | Leptosol | Shallow, stony soil with little or no development of soil genetic horizons |
| TA T5-8  | 599 m | 2 cm   | 6 cm        | 3.0  | Tundra Meadow | Leptosol | Shallow, stony soil with little or no development of soil genetic horizons |
| TA T5-9  | 590 m | 2 cm   | 10 cm       | 0.0  | Tundra Meadow | Leptosol | Shallow, stony soil with little or no development of soil genetic horizons |
| TA T5-10 | 581 m | 8 cm   | 27 cm       | 1.0  | Tundra Meadow | Leptosol | Shallow, stony soil with little or no development of soil genetic horizons |
| TA T5-11 | 576 m | 6 cm   | 29 cm       | 2.5  | Tundra Meadow | Leptosol | Shallow, stony soil with little or no development of soil genetic horizons |
| TA T5-12 | 566 m | 3.5 cm | 10 cm       | 0.6  | Tundra Meadow | Leptosol | Shallow, stony soil with little or no development of soil genetic horizons |
| TA T5-13 | 562 m | 7 cm   | > 80 cm     | 1.6  | Tundra Meadow | Cambisol | Moderately developed soil, with some development of soil horizons          |

## Reference:

IUSS Working Group WRB: World reference base for soil resources, 2006, 2<sup>nd</sup> ed., World Soil Resources Reports, 103, FAO, Rome, pp. 143, 2006.
